# Supplementary material for: Influence of Immunosuppressive Regimen on Diffusivity and Oxygenation of Kidney Transplants—Analysis of Functional MRI Data from the Randomized ZEUS Trial
Source: MDPI journal article supplement (doi:10.3390/jcm11123284), 2022-06-08
Supplement: s1 [file s1]

**Table S2. Histological characteristics at baseline and follow-up.**

| Subjects    | Randomization | AR    | Arteriolar hyalinosis | ATN   | IFTA  | Other | Precision other findings                                                      |
|-------------|---------------|-------|-----------------------|-------|-------|-------|-------------------------------------------------------------------------------|
| Patient 1*  | CsA           | 0/0   | 2/1                   | 0/0   | 1/1   | 1/0   | Interstitial-intratubular calcium crystals                                    |
| Patient 2*  | CsA           | na    | na                    | na    | na    | na    |                                                                               |
| Patient 3   | CsA           | 0/1   | 1.5/2                 | 0/0   | 1/1   | 0/1   | Borderline rejection, BKV                                                     |
| Patient 4   | CsA           | 0/1   | 0/0                   | 0/0   | 1/0   | 1/0   | Severe arteriosclerosis, cytoplasmic crystals/0                               |
| Patient 5   | CsA           | 0/0   | 0/0                   | 0/1   | 0/0   | 0/1   | Interstitial calcium crystals                                                 |
| Patient 6*  | CsA           | 0/na  | 0/na                  | 0/na  | 0/na  | 0/na  | Glomerulomegaly                                                               |
| Patient 7   | CsA           | 0/0   | 0/2                   | 0/0   | 0/1   | 0/0   |                                                                               |
|             |               |       |                       |       |       |       |                                                                               |
| Patient 8   | EVE           | 0/0   | 0/0                   | 0/0   | 1/1   | 0/0   |                                                                               |
| Patient 9   | EVE           | na/na | na/na                 | na/na | na/na | na/1  | Soft tissue (no renal tissue)                                                 |
| Patient 10  | EVE           | na/na | na/na                 | na/na | na/na | na/na | Muscle (no renal tissue)                                                      |
| Patient 11  | EVE           | na/0  | na/0                  | na/0  | na/1  | 1/0   | Muscle (no renal tissue)                                                      |
| Patient 12  | EVE           | 0/0   | 2/3                   | 0/0   | 1/0   | 1/0   | Calcium crystals                                                              |
| Patient 13  | EVE           | na/na | na/na                 | na/na | na/na | na/na |                                                                               |
| Patient 14  | EVE           | 0/1   | 0/0                   | 0/0   | 0/0   | 0/1   | n.r.; interstitial concretions, severe arteriosclerosis, borderline rejection |
| Patient 15  | EVE           | 0/0   | 0/0                   | 0/0   | 0/1   | 0/0   |                                                                               |
|             |               |       |                       |       |       |       |                                                                               |
| Patient 16* | na            | 1/na  | 0/na                  | 0/na  | 1/na  | 0/na  |                                                                               |
|             |               |       |                       |       |       |       |                                                                               |

Values are given as raw data for two different time-points (month 4.5/month12) on a semiquantitative scale (0-3 with increasing severity) for arteriolar hyalinosis and interstitial fibrosis and tubular atrophy (IFTA) or binary (0=absence, 1=presence) for acute rejection (AR), acute tubular necrosis (ATN) and other findings. Time-points are separated ciclosporin (CsA); everolimus (EVE); not available (na); not representative (n.r.).\* designs patients excluded from final MR analysis.
