# Supplementary material for: Influence of Immunosuppressive Regimen on Diffusivity and Oxygenation of Kidney Transplants—Analysis of Functional MRI Data from the Randomized ZEUS Trial
Source: MDPI journal article supplement (doi:10.3390/jcm11123284), 2022-06-08
Supplement: s1 [file s1]

**Table S1. Clinical characteristics of the total study population (n=16).**

|                                    | <b>Subjects included in final MR analysis (n=12)</b> | <b>Subjects excluded from final MR analysis (n=4)</b> |
|------------------------------------|------------------------------------------------------|-------------------------------------------------------|
| Age at transplantation (years)     | 45±11 (47; 29-62)                                    | 54.5±3 (54; 52-59)                                    |
| Female gender (%)                  | 50                                                   | 25                                                    |
| Living donor (%)                   | 17                                                   | 0                                                     |
| Donor age (years)                  | 51±14 (56; 23-65)                                    | 52±10 (52; 42-63)                                     |
| Extended criteria donor (%)        | 33                                                   | 25                                                    |
| Transplant episode (%)             |                                                      |                                                       |
| - first                            | 69                                                   | 75                                                    |
| Cold ischemia time (min.)          | 467±232                                              | 449±190                                               |
| Delayed graft function (%)         | 8                                                    | 25                                                    |
| eGFR (ml/min/1.73 m <sup>2</sup> ) | 64±22 (59; 35-109)                                   | 63±4 (65; 58-66)                                      |
| CsA trough level (ng/ml)           |                                                      |                                                       |
| - at baseline                      | 167±57 (144; 87-241)                                 | 154±8 (157; 145-161)                                  |
| - at 12 months                     | 131±6 (131; 126-135)                                 | 140±24 (132; 120-167)                                 |
| 24 hour-blood pressure (mmHg)      |                                                      |                                                       |
| - systolic                         | 119±12                                               | 129±4                                                 |
| - diastolic                        | 78±11                                                | 83±5                                                  |
| - mean                             | 99±12                                                | 106±5                                                 |
| Hemoglobin (g/l)                   |                                                      |                                                       |
| - at baseline                      | 124±16                                               | 149±30                                                |
| - at 12 months                     | 121±16                                               | 151±28                                                |
| Biopsy findings at screening       |                                                      |                                                       |
| - BPAR (%)                         | 0                                                    | 25                                                    |
| - arteriolar hyalinosis (0-3)      | 0.4±0.8                                              | 0.7±1.2                                               |
| - IFTA (0-3)                       | 0.5±0.5                                              | 0.7±0.6                                               |
| Time to MR scan (months)           |                                                      |                                                       |
| - baseline MR                      | 3.8±0.6                                              | 3.5±0.6                                               |
| - second MR                        | 12±0.7                                               | na                                                    |

Values are given as mean ± standard deviation (median; range) or as percentage of patients, as appropriate. Number (n); ciclosporin (CsA); everolimus (EVE); estimated glomerular filtration rate (eGFR) estimated according to chronic kidney disease epidemiology collaboration formula; magnetic resonance (MR); biopsy-proven acute rejection (BPAR); interstitial fibrosis and tubular atrophy (IFTA); not available (na).
